# Supplementary material for: A local and global sensitivity analysis of a mathematical model of coagulation and platelet deposition under flow
Source: PubMed Central journal article supplement (PMC6062055; doi:10.1371/journal.pone.0200917), 2018-07-26

**S2 Fig. Monotonicity of Change in Thrombin Generation due to Variation in PCs.** Variation in the three physiologically relevant metrics of thrombin generation: A) lag time; B) maximum relative rate of thrombin generation; 3) final concentration of thrombin: due to variations in platelet characteristics.

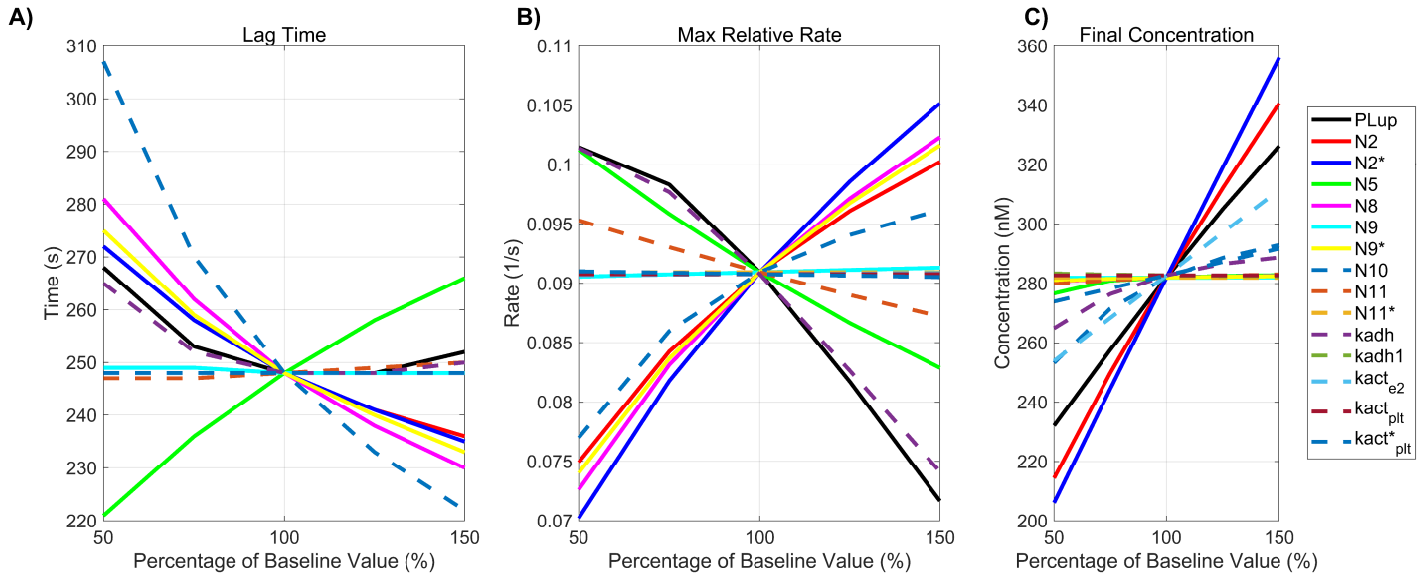

Supplement: pone.0200917.s002.pdf [file pone.0200917.s002.pdf]
