# Supplementary material for: A local and global sensitivity analysis of a mathematical model of coagulation and platelet deposition under flow
Source: PubMed Central journal article supplement (PMC6062055; doi:10.1371/journal.pone.0200917), 2018-07-26

**S3 Fig. Sensitivity of MM screening results to shear rate.** The method of Morris procedure with trajectory selection was conducted and the associated  $\ell_2$ -norm of the Morris sensitivity measures  $\mu^*$ ,  $\sigma$  for **A)** lag time\*; **B)** maximum relative rate\*; **C)** final amount; were calculated for shear rate 90, 100, and 110 (1/s). Parameters with the normalized  $\ell_2$ -norm of the Morris mean  $\mu^*$  and standard deviation  $\sigma$  greater than 0.5 for any of the path subsets were chosen to highlight that the results of the method of Morris are not sensitive to perturbations in shear rate.

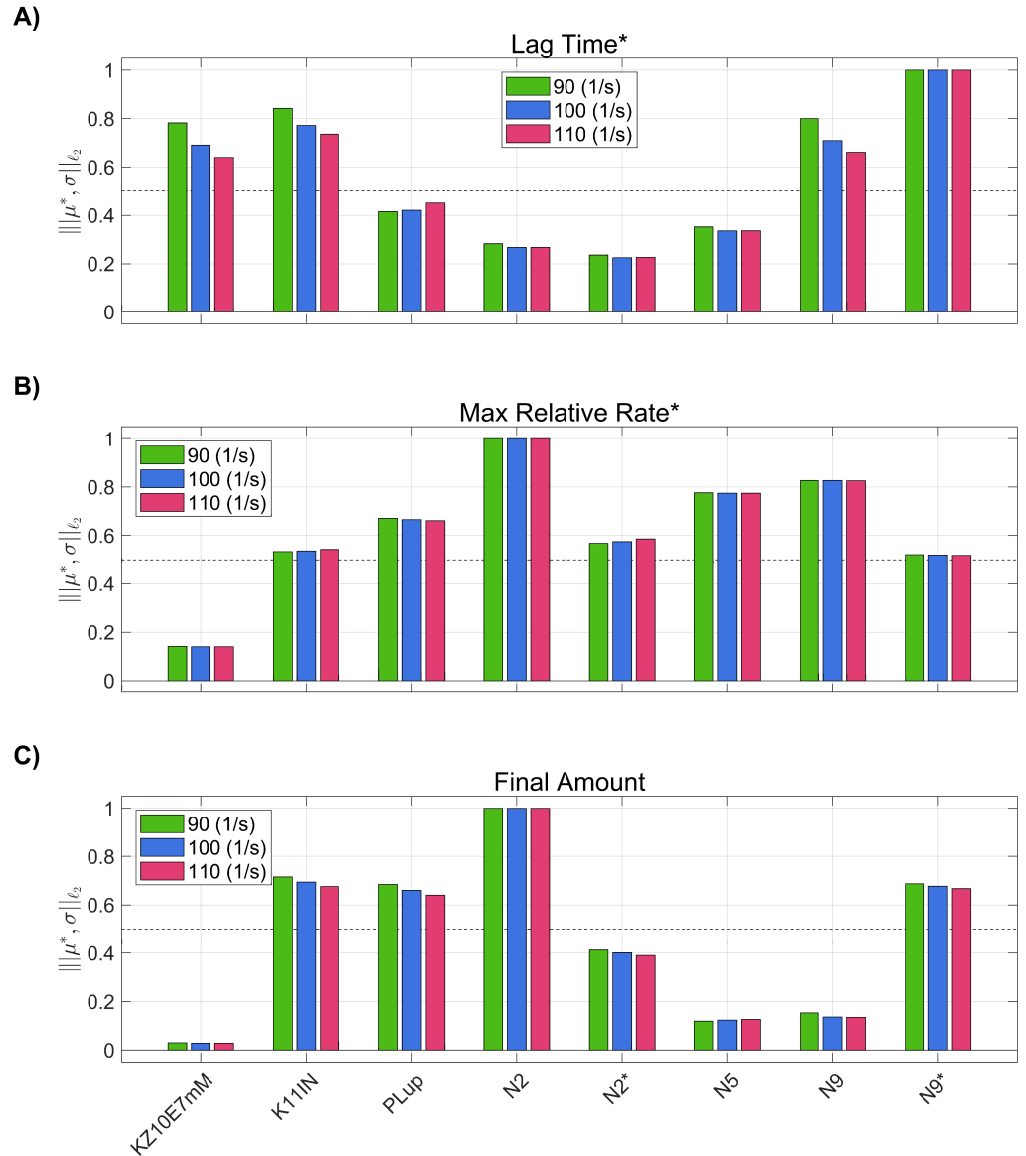

Supplement: pone.0200917.s003.pdf [file pone.0200917.s003.pdf]
