# Supplementary material for: A local and global sensitivity analysis of a mathematical model of coagulation and platelet deposition under flow
Source: PubMed Central journal article supplement (PMC6062055; doi:10.1371/journal.pone.0200917), 2018-07-26

**S6 Fig. Screening for all model parameters using the Method of Morris.**  
 The method of Morris procedure with trajectory selection was conducted three times to generate path sets  $P_1, P_2, P_3$ . The associated  $\ell_2$ -norm of the Morris sensitivity measures  $\mu^*, \sigma$  for **A)** lag time; **B)** maximum relative rate; **C)** final concentration; were calculated. Parameters with the normalized  $\ell_2$ -norm of  $\mu^*$  and  $\sigma$  greater than 0.5 for any of the path subsets were chosen as candidates for the global Sobol method, determining a 33 model parameter subset.

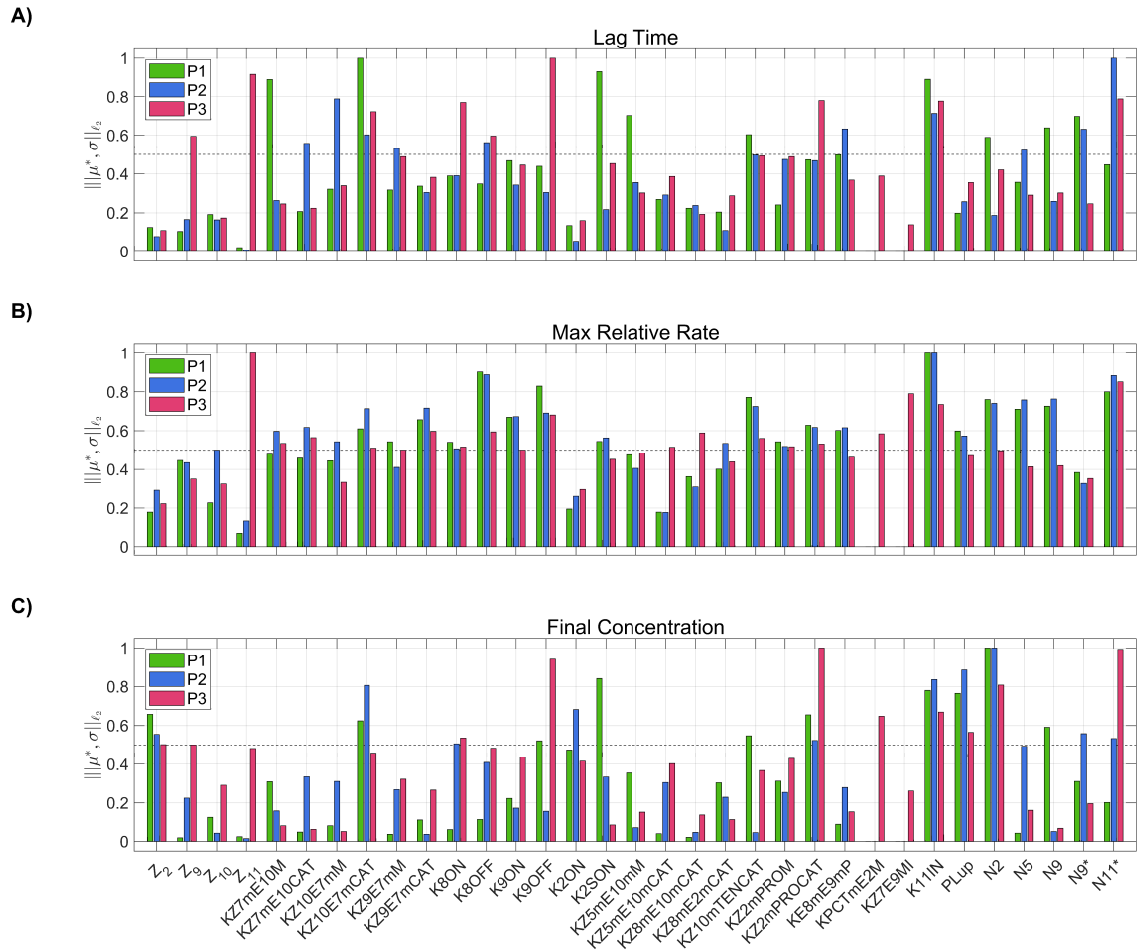

Supplement: pone.0200917.s006.pdf [file pone.0200917.s006.pdf]
